# Supplementary material
Source: MDPI journal article supplement (https://www.mdpi.com/2079-9276/10/9/91)
Supplement: s1 [file s1]

## Article

# Opportunities and Challenges of the European Green Deal for the Chemical Industry: An Approach Measuring Innovations in Bioeconomy

Lisa Thormann, Ulf Neuling and Martin Kaltschmitt

## Supplementary Materials

### S.1. Materials and methods

#### S.1.1. System definition and identification of system boundaries

**Table S1.** Overview of constant and variable input parameters for the evaluation of relevant biomass resources.

| Exogenous                                                                                                                                                                                                                                                                                                                                                                                                                                                                                                                                                                                                                                                                                                                                                                                                                                                                                                                                                                                                                                                                                                                                                                                                                                                                                                                                                                                                                                                                                                                                                                                                                                                                                                                                                                                                                                                                                                                       |  | Endogenous                                                                                                                                                                                                                                                                                                                         |
|---------------------------------------------------------------------------------------------------------------------------------------------------------------------------------------------------------------------------------------------------------------------------------------------------------------------------------------------------------------------------------------------------------------------------------------------------------------------------------------------------------------------------------------------------------------------------------------------------------------------------------------------------------------------------------------------------------------------------------------------------------------------------------------------------------------------------------------------------------------------------------------------------------------------------------------------------------------------------------------------------------------------------------------------------------------------------------------------------------------------------------------------------------------------------------------------------------------------------------------------------------------------------------------------------------------------------------------------------------------------------------------------------------------------------------------------------------------------------------------------------------------------------------------------------------------------------------------------------------------------------------------------------------------------------------------------------------------------------------------------------------------------------------------------------------------------------------------------------------------------------------------------------------------------------------|--|------------------------------------------------------------------------------------------------------------------------------------------------------------------------------------------------------------------------------------------------------------------------------------------------------------------------------------|
| a. Constant spatial terms                                                                                                                                                                                                                                                                                                                                                                                                                                                                                                                                                                                                                                                                                                                                                                                                                                                                                                                                                                                                                                                                                                                                                                                                                                                                                                                                                                                                                                                                                                                                                                                                                                                                                                                                                                                                                                                                                                       |  |                                                                                                                                                                                                                                                                                                                                    |
|                                                                                                                                                                                                                                                                                                                                                                                                                                                                                                                                                                                                                                                                                                                                                                                                                                                                                                                                                                                                                                                                                                                                                                                                                                                                                                                                                                                                                                                                                                                                                                                                                                                                                                                                                                                                                                                                                                                                 |  | <u>Plant specifications</u> <ul style="list-style-type: none"><li>Input of feedstock equivalent to 150 000 gross tonne straw/year</li></ul>                                                                                                                                                                                        |
| b. Variable spatial terms                                                                                                                                                                                                                                                                                                                                                                                                                                                                                                                                                                                                                                                                                                                                                                                                                                                                                                                                                                                                                                                                                                                                                                                                                                                                                                                                                                                                                                                                                                                                                                                                                                                                                                                                                                                                                                                                                                       |  |                                                                                                                                                                                                                                                                                                                                    |
| <u>Plant biomass (feedstock) characteristics</u> <ul style="list-style-type: none"><li>Moisture content of feedstock on wet basis (wt %)<ul style="list-style-type: none"><li>Agricultural residues</li><li>Energy crops</li><li>Forestry residues from coniferous trees</li><li>Forestry residues from non-coniferous trees</li></ul></li><li>Lower heating value (MJ/kg)<ul style="list-style-type: none"><li>Agricultural residues</li><li>Energy crops</li><li>Forestry residues from coniferous trees</li><li>Forestry residues from non-coniferous trees</li></ul></li></ul> <u>Biomass availability and identification of plant location</u> <ul style="list-style-type: none"><li>Technical potential of feedstock per NUTS 3 region (gross tonne DM/km²)<ul style="list-style-type: none"><li>Primary residues from forest<ul style="list-style-type: none"><li>Logging residues from final fellings &amp; thinnings<ul style="list-style-type: none"><li>Final felling from non-coniferous trees</li><li>Final fellings from coniferous trees</li><li>Thinnings from non-coniferous trees</li><li>Thinnings from coniferous trees</li></ul></li><li>Stumps from final fellings &amp; thinnings<ul style="list-style-type: none"><li>Final felling from non-coniferous trees</li><li>Final fellings from coniferous trees</li></ul></li></ul></li><li>Energy crops<ul style="list-style-type: none"><li>Primary production of lignocellulosic biomass crops: Energy grasses, annual &amp; perennial crops<ul style="list-style-type: none"><li>Miscanthus (Perennial grass)</li><li>Switchgrass (Perennial grass)</li><li>Giant reed (Perennial grass)</li><li>Reed Canary Grass (Perennial grass)</li></ul></li></ul></li><li>Agricultural residues<ul style="list-style-type: none"><li>Straw<ul style="list-style-type: none"><li>Cereals straw</li><li>Oil seed rape straw</li></ul></li></ul></li></ul></li></ul> |  | <u>Plant biomass (feedstock) input</u> <ul style="list-style-type: none"><li>Share of biomass input per plant location (%)<ul style="list-style-type: none"><li>Agricultural residues</li><li>Energy crops</li><li>Forestry residues from coniferous trees</li><li>Forestry residues from non-coniferous trees</li></ul></li></ul> |

|                                                                                                                                                                                                                                                                                                                                                                                                                                                                                                                                                                                                                                                                                                                                                                                                                                                                                                                                                                                                                                                                                                                                                                                                                                                                                                                                                                                                                                                                                                                                                                                                                     |  |
|---------------------------------------------------------------------------------------------------------------------------------------------------------------------------------------------------------------------------------------------------------------------------------------------------------------------------------------------------------------------------------------------------------------------------------------------------------------------------------------------------------------------------------------------------------------------------------------------------------------------------------------------------------------------------------------------------------------------------------------------------------------------------------------------------------------------------------------------------------------------------------------------------------------------------------------------------------------------------------------------------------------------------------------------------------------------------------------------------------------------------------------------------------------------------------------------------------------------------------------------------------------------------------------------------------------------------------------------------------------------------------------------------------------------------------------------------------------------------------------------------------------------------------------------------------------------------------------------------------------------|--|
| <ul style="list-style-type: none"> <li>○ Maize stover</li> <li>○ Sugarbeet leaves</li> <li>○ Sunflower straw</li> </ul> <p><u>Energy crop farming (miscanthus)</u></p> <ul style="list-style-type: none"> <li>• Diesel for non-road application (agriculture tractor diesel HP 600) (MJ)</li> <li>• Electricity (MJ)</li> <li>• Nitrogen (t)</li> <li>• Phosphoric acid P205 (t)</li> <li>• Potassium oxide (t)</li> <li>• Herbicides (t)</li> <li>• Calcium carbonate (t)</li> </ul> <p><u>Field treatment, drying, collection, handling and storage (miscanthus)</u></p> <ul style="list-style-type: none"> <li>• High density polyethylene (t)</li> </ul> <p><u>Agriculture residues (MJ)</u></p> <ul style="list-style-type: none"> <li>• Carbon dioxide</li> <li>• Diesel, combusted</li> <li>• Agrochemicals</li> <li>• Phosphorous</li> <li>• Gasoline</li> <li>• Nitrogen</li> <li>• Quicklime</li> <li>• Water</li> </ul> <p><u>Forestry residues – Forwarding with forwarder</u></p> <ul style="list-style-type: none"> <li>• Diesel for non-road application (high sulphur content, tractor) (MJ)</li> <li>• Lubricants (t)</li> </ul> <p><u>Forestry residues – Loading and unloading of loose residues</u></p> <ul style="list-style-type: none"> <li>• Diesel for non-road application (high sulphur content, tractor) (MJ)</li> <li>• Lubricants (t)</li> </ul> <p><u>Forestry residues – Chipping (including residue feeding to chipper)</u></p> <ul style="list-style-type: none"> <li>• Diesel for non-road application (high sulphur content, tractor) (MJ)</li> <li>• Lubricants (t)</li> </ul> |  |
|---------------------------------------------------------------------------------------------------------------------------------------------------------------------------------------------------------------------------------------------------------------------------------------------------------------------------------------------------------------------------------------------------------------------------------------------------------------------------------------------------------------------------------------------------------------------------------------------------------------------------------------------------------------------------------------------------------------------------------------------------------------------------------------------------------------------------------------------------------------------------------------------------------------------------------------------------------------------------------------------------------------------------------------------------------------------------------------------------------------------------------------------------------------------------------------------------------------------------------------------------------------------------------------------------------------------------------------------------------------------------------------------------------------------------------------------------------------------------------------------------------------------------------------------------------------------------------------------------------------------|--|

**Table S2.** Overview of constant and variable input parameters for the evaluation of relevant biomass provisions and logistics.

|                                  | Exogenous                                                                                                                                                                                                                                                                                                                                                                                                                                                                                                                                                                                                                                                                                                                                                                                                                                                                                                                                                                                                                                                                                                                                                                                                                                                                                                                                                                                                                                                                                                                                                                                                                                                                                                                                                                                                                                                                                        | Endogenous                                                                                                                                                                                                                                                                                             |
|----------------------------------|--------------------------------------------------------------------------------------------------------------------------------------------------------------------------------------------------------------------------------------------------------------------------------------------------------------------------------------------------------------------------------------------------------------------------------------------------------------------------------------------------------------------------------------------------------------------------------------------------------------------------------------------------------------------------------------------------------------------------------------------------------------------------------------------------------------------------------------------------------------------------------------------------------------------------------------------------------------------------------------------------------------------------------------------------------------------------------------------------------------------------------------------------------------------------------------------------------------------------------------------------------------------------------------------------------------------------------------------------------------------------------------------------------------------------------------------------------------------------------------------------------------------------------------------------------------------------------------------------------------------------------------------------------------------------------------------------------------------------------------------------------------------------------------------------------------------------------------------------------------------------------------------------|--------------------------------------------------------------------------------------------------------------------------------------------------------------------------------------------------------------------------------------------------------------------------------------------------------|
| <b>a. Constant spatial terms</b> |                                                                                                                                                                                                                                                                                                                                                                                                                                                                                                                                                                                                                                                                                                                                                                                                                                                                                                                                                                                                                                                                                                                                                                                                                                                                                                                                                                                                                                                                                                                                                                                                                                                                                                                                                                                                                                                                                                  |                                                                                                                                                                                                                                                                                                        |
|                                  | <u>Truck specifications</u> <ul style="list-style-type: none"> <li>• Owners interest (%)</li> <li>• Loan interest (%)</li> <li>• Loading and unloading time (truck) (h) <ul style="list-style-type: none"> <li>- Chips</li> <li>- Straw</li> <li>- Oil</li> </ul> </li> <li>• Average speed on private/unsealed road (km/h)</li> <li>• Average speed on public/sealed road (km/h)</li> <li>• Truck operation mode (single or fleet operation mode)</li> <li>• Truck fuel consumption (L/100 km) <ul style="list-style-type: none"> <li>- Highway</li> <li>- Forest</li> <li>- 60 gross tonne truck off highway</li> <li>- Private/Unsealed road</li> </ul> </li> <li>• Truck and trailer (€/y) <ul style="list-style-type: none"> <li>- Residual value of purchase price truck (%)</li> <li>- Residual value of purchase price truck (%)</li> <li>- Oil consumption (L/1 000km)</li> <li>- Front axle: new (km/tyre)</li> <li>- Drive tyre: new (km/tyre)</li> <li>- Trailer tyre: new (km/tyre)</li> <li>- Number of front axle tyres</li> <li>- Number of drive tyres</li> <li>- Number tyres trailer</li> <li>- Percentage new drive tyres (%)</li> <li>- Percentage new trailer tyres (%)</li> <li>- Distance on retread compared to new tyre (%)</li> <li>- Garage distance truck per day (km)</li> </ul> </li> </ul> <u>Biomass and oil characteristics</u> <ul style="list-style-type: none"> <li>• Packing fraction of input biomass and oil (m<sup>3</sup>/m<sup>3</sup>) <ul style="list-style-type: none"> <li>- Chips</li> <li>- Straw</li> <li>- Oil</li> </ul> </li> </ul> <u>Working conditions</u> <ul style="list-style-type: none"> <li>• Wet days – no adequate working conditions (d)</li> <li>• Protective equipment allowance paid to workers (€)</li> </ul> <u>Toll fees</u> <ul style="list-style-type: none"> <li>• Road user charges/toll/maut (€/1 000 km)</li> </ul> | <u>General assumptions</u> <ul style="list-style-type: none"> <li>• Inflation is neglected</li> <li>• Focus on normal trucks, no heavy load trucks</li> <li>• Standard payload</li> <li>• Terrain type is neglected</li> <li>• Three central collection sites per plant location</li> </ul>            |
| <b>b. Variable spatial terms</b> |                                                                                                                                                                                                                                                                                                                                                                                                                                                                                                                                                                                                                                                                                                                                                                                                                                                                                                                                                                                                                                                                                                                                                                                                                                                                                                                                                                                                                                                                                                                                                                                                                                                                                                                                                                                                                                                                                                  |                                                                                                                                                                                                                                                                                                        |
|                                  | <u>Fuel and engine oil prices</u> <ul style="list-style-type: none"> <li>• Gasoline price for transportation (€/L)</li> <li>• Diesel price for transportation (€/L)</li> <li>• Engine oil (€/L)</li> </ul> <u>Biomass harvesting costs</u> <ul style="list-style-type: none"> <li>• Residue harvesting costs (€/gross tonne) <ul style="list-style-type: none"> <li>- Cutover</li> <li>- Landing</li> <li>- Steep cutover</li> </ul> </li> </ul> <u>Working conditions (truck)</u> <ul style="list-style-type: none"> <li>• Max. shift hours (truck) (h)</li> <li>• Driver wages (€/h)</li> <li>• Average wages (of workers) (€/h)</li> <li>• Accident insurance of transport (€/€100)</li> <li>• Total paid days per year (d)</li> <li>• Bank/saturation holidays (d)</li> <li>• Sick leave (d)</li> <li>• Leave per year (d)</li> </ul>                                                                                                                                                                                                                                                                                                                                                                                                                                                                                                                                                                                                                                                                                                                                                                                                                                                                                                                                                                                                                                                        | <u>Type of truck according to transported good</u> <ul style="list-style-type: none"> <li>• Chips</li> <li>• Straw</li> <li>• Oil</li> </ul> <u>Average transportation distance (km)</u> <ul style="list-style-type: none"> <li>• On private/unsealed road</li> <li>• On public/sealed road</li> </ul> |

Truck specifics

- Truck driver tyres per year (€)
- Truck trailer tyres per year (€)
- Truck tyre retread per year (€)
- Trailer tyre retread per year (€)
- Chip truck costs (€)
- Chip truck trailer costs (€)
- Straw truck costs (€)
- Straw truck trailer costs (€)
- Oil truck costs (€)
- Oil truck trailer costs (€)
- Registration of truck (€/y)
- Truck and trailer annual maintenance costs (€/km)
  - Truck (€/km)
  - Trailer (€/axle/100 000km)
  - Turntables & Couplings (€/100 000 trailer km)
  - No. of trailer axles
  - No. of couplings & turn tables
  - Scale Repairs (€/100 000 combined km)
  - Structural Repairs (€/100 000 combined km)
  - Crane Repairs (€/100 000 truck km)
  - Painting (€/y)

Overhead costs (truck)

- Overhead costs (€/y)
  - Office costs
  - Parking lease
  - Office equipment
  - Postage, telephone, etc.
  - Office staff costs
  - Accountancy and legal fees
  - Bank and finance charges
  - Public liability insurance
  - Operating supplies
    - Fire equipment
    - Radio equipment
    - First aid
    - Safety
    - Tools
    - other
  - Training

Vehicle to drive workers to collection sites

- Toyota Hilux (€/a)
  - Vehicle kilometres per day (km/d)
  - Type: Petrol/diesel
  - Capacity (cc)
  - Year purchased (y)
  - Delivery price (€)
  - Current new price (€)
  - Expected life (km)
  - Current used price (€)
  - Tyre life (km)
  - New tyre price (set of 4) (€)
  - Proportion of ACI as loan (l)
  - Proportion of ACI as owners equity
  - R + M as % of depreciation
  - Taxation per km

Additional machine

- Tractor 4 wheel drive
  - Power (kw)
  - Year purchased
  - Delivery price
  - Current new price
  - Hours to be owned
  - Current used price

|                                                                                                                                                                                                                                                                                                                                                                                                                                                                                                                                                                                                                                                                                                                                                                                                                                                                                                                                                                                                                                                                                         |  |
|-----------------------------------------------------------------------------------------------------------------------------------------------------------------------------------------------------------------------------------------------------------------------------------------------------------------------------------------------------------------------------------------------------------------------------------------------------------------------------------------------------------------------------------------------------------------------------------------------------------------------------------------------------------------------------------------------------------------------------------------------------------------------------------------------------------------------------------------------------------------------------------------------------------------------------------------------------------------------------------------------------------------------------------------------------------------------------------------|--|
| <ul style="list-style-type: none"> <li>- Tyre life (hrs)</li> <li>- New tyre price (set of 4)</li> <li>- Proportion of allowance for credit losses as loan</li> <li>- Proportion of allowance for credit losses as owners equity</li> <li>- R + M as % of depreciation</li> <li>- Registration / taxation per km</li> <li>- Fuel consumption (l/kW/hr)</li> </ul> <p><u>Biomass characteristics and biomass (feedstock) costs</u></p> <ul style="list-style-type: none"> <li>• Physical density of transported goods (kg/m<sup>3</sup>).<sup>1</sup>Constant: spatial <ul style="list-style-type: none"> <li>- Pyrolysis oil<sup>1</sup></li> <li>- Biodiesel<sup>1</sup></li> <li>- Wood chips</li> <li>- Energy crops (perennial grass)<sup>1</sup></li> <li>- Agricultural residues<sup>1</sup></li> </ul> </li> <li>• Costs per type of input biomass (€/t) <ul style="list-style-type: none"> <li>- Agricultural residues</li> <li>- Energy crops</li> <li>- Forestry residues from coniferous trees</li> <li>- Forestry residues from non-coniferous trees</li> </ul> </li> </ul> |  |
|-----------------------------------------------------------------------------------------------------------------------------------------------------------------------------------------------------------------------------------------------------------------------------------------------------------------------------------------------------------------------------------------------------------------------------------------------------------------------------------------------------------------------------------------------------------------------------------------------------------------------------------------------------------------------------------------------------------------------------------------------------------------------------------------------------------------------------------------------------------------------------------------------------------------------------------------------------------------------------------------------------------------------------------------------------------------------------------------|--|

**Table S3.** Overview of constant and variable input parameters for the evaluation of relevant biomass conversion route.

| Exogenous                                                                                                                                                                                                                                                                                                                                                                                                                                                                                                                                                                                                                                                                                                                                                                                                                                                                                                                                                                                                                                                                                                                                                                                                                                                                                                                                                                                                     | Endogenous                                                                                                                                                                                                                                                                                                                                                                                                                                                                                                                                                                                                                                                                                                                                                                                                                                                                                                                                                                                                                                                                                                                                                                                                                                                                                                                                                                                                                                                                                                     |
|---------------------------------------------------------------------------------------------------------------------------------------------------------------------------------------------------------------------------------------------------------------------------------------------------------------------------------------------------------------------------------------------------------------------------------------------------------------------------------------------------------------------------------------------------------------------------------------------------------------------------------------------------------------------------------------------------------------------------------------------------------------------------------------------------------------------------------------------------------------------------------------------------------------------------------------------------------------------------------------------------------------------------------------------------------------------------------------------------------------------------------------------------------------------------------------------------------------------------------------------------------------------------------------------------------------------------------------------------------------------------------------------------------------|----------------------------------------------------------------------------------------------------------------------------------------------------------------------------------------------------------------------------------------------------------------------------------------------------------------------------------------------------------------------------------------------------------------------------------------------------------------------------------------------------------------------------------------------------------------------------------------------------------------------------------------------------------------------------------------------------------------------------------------------------------------------------------------------------------------------------------------------------------------------------------------------------------------------------------------------------------------------------------------------------------------------------------------------------------------------------------------------------------------------------------------------------------------------------------------------------------------------------------------------------------------------------------------------------------------------------------------------------------------------------------------------------------------------------------------------------------------------------------------------------------------|
| <b>a. Constant spatial terms</b>                                                                                                                                                                                                                                                                                                                                                                                                                                                                                                                                                                                                                                                                                                                                                                                                                                                                                                                                                                                                                                                                                                                                                                                                                                                                                                                                                                              |                                                                                                                                                                                                                                                                                                                                                                                                                                                                                                                                                                                                                                                                                                                                                                                                                                                                                                                                                                                                                                                                                                                                                                                                                                                                                                                                                                                                                                                                                                                |
| <p><u>Catalysts specifications/ composition (environmental focus)</u></p> <ul style="list-style-type: none"> <li>• Type of catalyst <ul style="list-style-type: none"> <li>- Aluminium oxide <ul style="list-style-type: none"> <li>▪ Bauxite mining <ul style="list-style-type: none"> <li>○ Bauxite ore (t)</li> <li>○ Residual oil (mmBTU)</li> <li>○ Electricity (mmBTU)</li> <li>○ Water mining (gal)</li> <li>○ Diesel for non-road applications (mmBTU)</li> </ul> </li> <li>▪ Bauxite refining <ul style="list-style-type: none"> <li>○ Residual oil (mmBTU)</li> <li>○ Natural gas (mmBTU)</li> <li>○ Coal average (mmBTU)</li> <li>○ Electricity (mmBTU)</li> <li>○ Lime (t)</li> <li>○ Water process (gal)</li> <li>○ Sodium hydroxide (t)</li> <li>○ Bauxite (t)</li> </ul> </li> </ul> </li> <li>- Zeolite <ul style="list-style-type: none"> <li>▪ ZSM-5 (t)</li> <li>▪ SiO<sub>2</sub> gel (t)</li> <li>▪ Kaolin (t)</li> </ul> </li> <li>- Molybdenum <ul style="list-style-type: none"> <li>▪ Natural gas (mmBTU)</li> <li>▪ Conventional diesel (mmBTU)</li> <li>▪ MoS<sub>2</sub> (t)</li> <li>▪ Ammonium hydroxide (t)</li> </ul> </li> <li>- Cobalt <ul style="list-style-type: none"> <li>▪ Cobalt oxide (t)</li> <li>▪ Nitric acid (t)</li> </ul> </li> <li>- Nickel <ul style="list-style-type: none"> <li>▪ Nickel (t)</li> <li>▪ Nitric acid (t)</li> </ul> </li> </ul> </li> </ul> | <p><u>Technology readiness level (TRL)</u></p> <ul style="list-style-type: none"> <li>• No. of technology readiness level</li> </ul> <p><u>General assumptions</u></p> <ul style="list-style-type: none"> <li>• Plant life (operational) (y)</li> <li>• Operating days per year (h)</li> <li>• Plant life (economical) (y)</li> <li>• Interest rate (%)</li> <li>• Maintenance costs (%)</li> </ul> <p><u>Catalysts specifications</u></p> <ul style="list-style-type: none"> <li>• Type of catalyst</li> <li>• Price (€/kg)</li> <li>• Required quantity (kg catalyst / gross tonne feed-stock)</li> <li>• Recycling rate catalysts (%)</li> </ul> <p><u>Biomass</u></p> <ul style="list-style-type: none"> <li>• Tolerable moisture content (wt%)</li> </ul> <p><u>Parameter of plant concepts (environmental focus)</u></p> <ul style="list-style-type: none"> <li>• Input (MJ/kg) <ul style="list-style-type: none"> <li>- Biomass (rhizomes)</li> <li>- Natural gas</li> <li>- Electricity</li> <li>- Diesel</li> <li>- Steam</li> </ul> </li> <li>• Output (MJ/kg) <ul style="list-style-type: none"> <li>- Gasoline</li> <li>- Diesel</li> <li>- Electricity</li> <li>- Char</li> <li>- Steam</li> </ul> </li> </ul> <p><u>Plant output (MJ/kg) (technical focus)</u></p> <ul style="list-style-type: none"> <li>• HHV diesel</li> <li>• HHV gasoline</li> <li>• HHV off-gas</li> <li>• HHV char</li> <li>• Biomass input dry</li> <li>• Biomass input wet</li> <li>• Fast pyrolysis product</li> </ul> |

|                                                                                                                                                                                                                                                                                                                                                                                                                                                                                                                                                                                                                                                                                                                                                                                                  |                                                                                                                                                                                                                                                                                                                                                                                                                                                                                                                                                                                                                     |
|--------------------------------------------------------------------------------------------------------------------------------------------------------------------------------------------------------------------------------------------------------------------------------------------------------------------------------------------------------------------------------------------------------------------------------------------------------------------------------------------------------------------------------------------------------------------------------------------------------------------------------------------------------------------------------------------------------------------------------------------------------------------------------------------------|---------------------------------------------------------------------------------------------------------------------------------------------------------------------------------------------------------------------------------------------------------------------------------------------------------------------------------------------------------------------------------------------------------------------------------------------------------------------------------------------------------------------------------------------------------------------------------------------------------------------|
|                                                                                                                                                                                                                                                                                                                                                                                                                                                                                                                                                                                                                                                                                                                                                                                                  | <ul style="list-style-type: none"> <li>Hydrotreated pyrolysis oil</li> <li>HHV natural gas</li> </ul> <u>Additional plant input and outputs (MJ/MJ)</u> <ul style="list-style-type: none"> <li>Plant electricity               <ul style="list-style-type: none"> <li>Plant electricity use</li> <li>Plant purchased electricity</li> <li>Electricity sold to grid</li> </ul> </li> <li>Co-products               <ul style="list-style-type: none"> <li>Co-product sold (char)</li> <li>Co-product sold (steam)</li> </ul> </li> <li>Plant natural gas use</li> <li>Plant diesel use</li> <li>Steam use</li> </ul> |
| <b>b. Variable spatial terms</b>                                                                                                                                                                                                                                                                                                                                                                                                                                                                                                                                                                                                                                                                                                                                                                 |                                                                                                                                                                                                                                                                                                                                                                                                                                                                                                                                                                                                                     |
| <u>Biomass input</u> <ul style="list-style-type: none"> <li>Feedstock costs (€/odt)</li> </ul> <u>Energy prices</u> <ul style="list-style-type: none"> <li>Natural gas (€/GJ)</li> <li>Diesel (€/L)</li> <li>Electricity sold (€/kWh)</li> <li>Electricity purchased (€/kWh)</li> <li>Gasoline (€/L)</li> <li>Fuel oil (€/L)</li> </ul> <u>Additional costs</u> <ul style="list-style-type: none"> <li>Price for sand (€/y)</li> <li>Costs for waste disposal (€/y)</li> </ul> <u>Labour prices and working days per year</u> <ul style="list-style-type: none"> <li>Production labour (€/hr)</li> <li>Foreman labour (€/hr)</li> <li>Specialist labour (€/hr)</li> <li>Office Staff (€/yr)</li> <li>Management staff (€/yr)</li> <li>Working days per year (d/y)</li> </ul> Tax rate (EBIT) (%) | <u>Biomass input</u> <ul style="list-style-type: none"> <li>Feedstock mix (%)</li> </ul>                                                                                                                                                                                                                                                                                                                                                                                                                                                                                                                            |

### S.1.2. Biomass provision

A general overview of biomass provision is provided in Figure S1, displaying the system boundaries for feedstock production from lignocellulosic biomass. This includes site preparation, planting, stand tending and harvesting of the biomass. After felling or cutting of the biomass, it is, if required, bundled and subsequently forwarded to a collection site, e.g., an interim storage at the edge of the field or in the wood, where the forestry residues, agricultural residues and energy crops are sized and prepared for collection. Typical parameters affecting supply and availability of biomass are its characteristics and cultivation. The specifics about different types of biomass include, e.g., the harvesting window, the crop yield, crop residue-to-grain or seed ratios, biomass volume, biomass density, biomass moisture content and biomass availability. The cultivation processes of biomass comprises crop tillage practices, fertilizer use, pesticide use, water use, energy for irrigation, machinery including fuel energy and infrastructure (e.g., tractors, harvesters and sheds)[1–7].

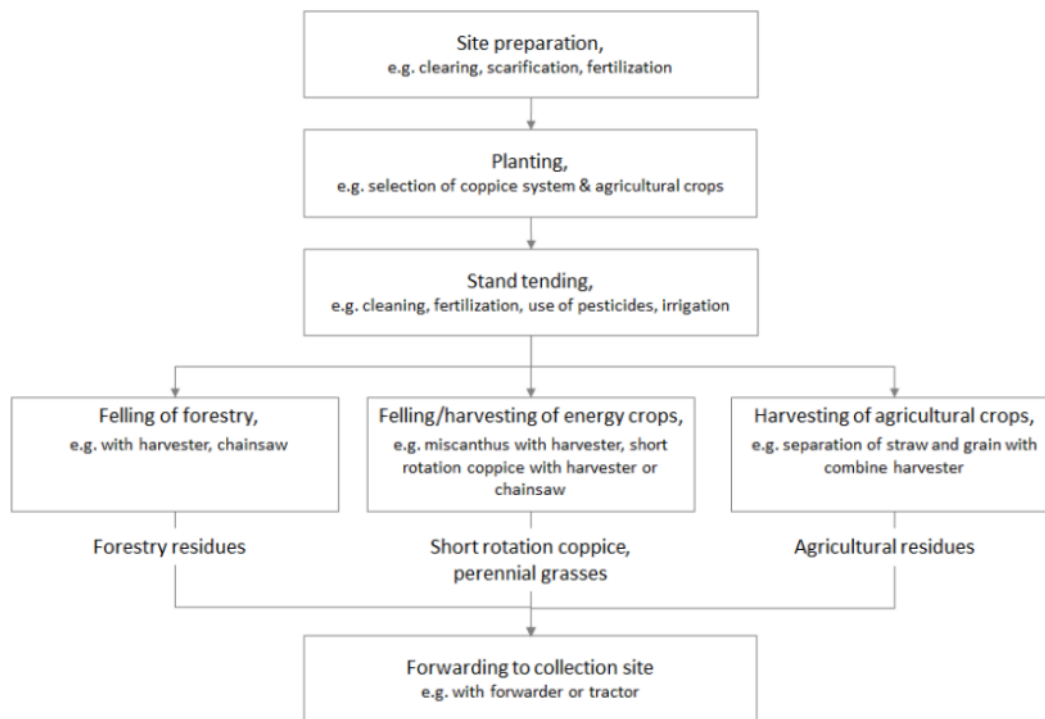

**Figure S1.** Simplified process scheme of the raw material supply chain from lignocellulosic biomass.

## S.2. Case study

### S.2.1. System definition

Determination of relevant biomass provision and logistics

**Table S4.** General input variables for biomass provision and logistics.

| Parameter                             | Unit              | All regions |
|---------------------------------------|-------------------|-------------|
| <i>Operational details (trucks)</i>   |                   |             |
| Load time                             |                   |             |
| Chips                                 | h                 | 0.67        |
| Straw                                 | h                 | 0.77        |
| Oil                                   | h                 | 0.50        |
| Unload time                           |                   |             |
| Chips                                 | h                 | 0.33        |
| Straw                                 | h                 | 0.50        |
| Oil                                   | h                 | 0.67        |
| <i>Physical density</i>               |                   |             |
| Pyrolysis oil                         | kg/m <sup>3</sup> | 1 240       |
| Biogenic diesel                       | kg/m <sup>3</sup> | 880         |
| Wood chips                            | kg/m <sup>3</sup> | 190         |
| Energy crops <sup>1</sup>             | kg/m <sup>3</sup> | 140         |
| Agricultural residues                 | kg/m <sup>3</sup> | 155         |
| <i>Additional operational details</i> |                   |             |
| Maximum shift hours                   | h                 | 12          |
| Average speed on unsealed roads       | km/h              | 35          |
| Average speed on sealed roads         | km/h              | 70          |

<sup>1</sup>Perennial grasses.

**Table S5.** Costs components of transportation.

| Costs component                | Unit    | Northern Europe | Central Europe | Southern Europe |
|--------------------------------|---------|-----------------|----------------|-----------------|
| <i>Fuel</i>                    |         |                 |                |                 |
| Gasoline                       | €/l     | 1.41            | 1.31           | 1.17            |
| Diesel                         | €/l     | 1.33            | 1.09           | 1.01            |
| Engine oil                     | €/l     | 3.23            | 3              | 2.68            |
| <i>Wages and labor aspects</i> |         |                 |                |                 |
| Driver                         | €/h     | 24.59           | 20.84          | 13.95           |
| Average wages                  | €/h     | 37.26           | 31.58          | 21.14           |
| Total paid days per year       | d       | 260             | 260            | 260             |
| Bank holidays                  | d       | 11              | 11             | 14              |
| Sick leave                     | d       | 19              | 18.4           | 18.6            |
| Leave in days                  | d       | 26              | 24             | 23              |
| <i>Truck costs</i>             |         |                 |                |                 |
| Chip truck                     | €       | 298 307         | 273 448        | 265 493         |
| Chip trailer                   | €       | 59 400          | 54 450         | 52 866          |
| Oil truck                      | €       | 298 307         | 273 448        | 245 827         |
| Oil trailer                    | €       | 199 800         | 183 150        | 164 650         |
| Straw truck                    | €       | 298 307         | 273 448        | 265 493         |
| Straw trailer                  | €       | 59 400          | 54 450         | 52 866          |
| <i>Truck fuel consumption</i>  |         |                 |                |                 |
| Highway                        | l/100km | 47.62           | 47.62          | 47.62           |
| Unsealed road                  | l/100km | 60              | 60             | 60              |



|                                  |                |           |           |           |
|----------------------------------|----------------|-----------|-----------|-----------|
| <i>Toll fee</i>                  |                |           |           |           |
| Truck                            | €/1,000km      | 75        | 75        | 75        |
| Trailer                          | €/1,000km      | 75        | 75        | 75        |
| <i>Truck specifications</i>      |                |           |           |           |
| Truck payload <sup>1</sup>       | t              | 28.25     | 24.50     | 24.50     |
| Truck volume <sup>1</sup>        | m <sup>3</sup> | 95        | 95        | 95        |
| <i>Overhead costs</i>            |                |           |           |           |
| Office costs                     | €/a            | 3 110.40  | 2 851.20  | 2 563.20  |
| Parking lease                    | €/a            | 1 036.80  | 95.40     | 854.40    |
| Postage, telephone and bills     | €/a            | 1 555.20  | 1 425.60  | 1 281.60  |
| Office staff costs               | €/a            | 3 061.80  | 2 806.65  | 2 523.15  |
| Accountancy and legal fees       | €/a            | 540.00    | 495.00    | 445.00    |
| Public liability insurance       | €/a            | 13 086.36 | 11 995.83 | 10 784.13 |
| Operating supplies <sup>2</sup>  | €/a            | 552.96    | 506.88    | 455.68    |
| <i>Vehicle costs<sup>3</sup></i> |                |           |           |           |
| Type                             |                | Diesel    | Diesel    | Diesel    |
| Capacity                         | cc             | 2 611     | 2 393     | 2 151     |
| Year purchased                   |                | 2017      | 2017      | 2017      |
| Delivery price                   | €              | 26825     | 24590     | 22106     |
| Expected life                    | km             | 150 000   | 150 000   | 150 000   |
| Current used price               | €              | 16 364    | 15 000    | 13 485    |
| Tyre life                        | km             | 40 000    | 40 000    | 40 000    |
| New tyre price <sup>4</sup>      | €              | 772       | 708       | 636       |
| Registration/taxation per year   | €              | 0.0012    | 0.0011    | 0.0010    |
| Fuel consumption                 | l/km           | 0.07      | 0.07      | 0.07      |
| Taxation                         | km             | 0.0008    | 0.0007    | 0.0007    |
| <i>Maintenance of trucks</i>     |                |           |           |           |
| Repairs                          | €/100,000km    | 1 347.84  | 1 235.52  | 1 110.72  |
| Painting                         | €/a            | 1 382.40  | 1 267.20  | 1 139.20  |

<sup>1</sup>For all kind of trucks, i.e. bin, chip, straw and oil trucks, <sup>2</sup>Fire equipment, radio equipment, first aid, safety, tools and other,

<sup>3</sup>Toyota Hilux, <sup>4</sup>Set of four tyres.

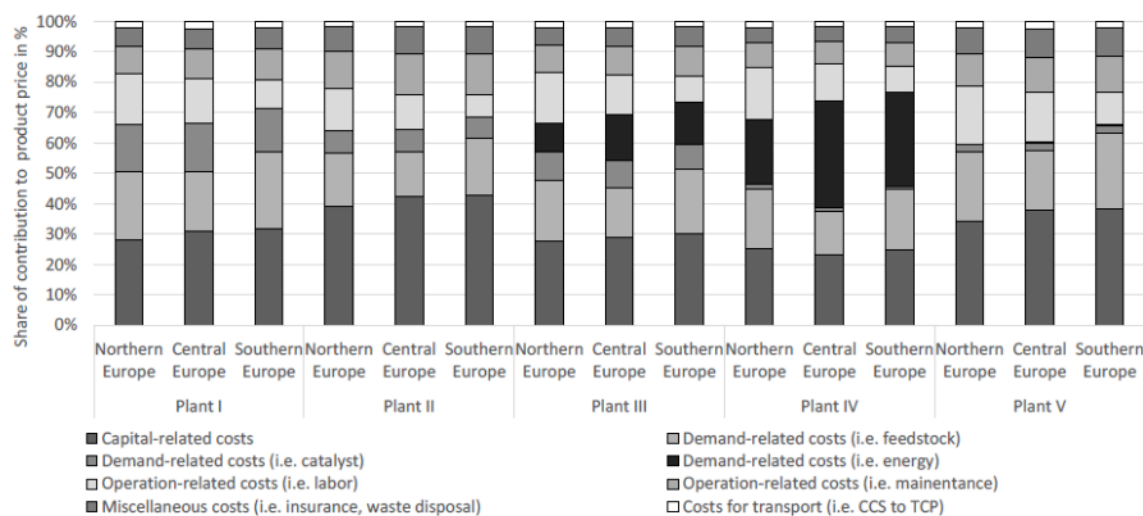

**Figure S2.** Share of contribution to the product price from cradle to plant gate, excluding potential co-products.

#### Determination of relevant biomass conversion routes

**Table S6.** Selected technical parameters for the five plant concepts.

| Parameter                          | Unit               | Plant I | Plant II | Plant III | Plant IV | Plant V |
|------------------------------------|--------------------|---------|----------|-----------|----------|---------|
| <i>Calorific value</i>             |                    |         |          |           |          |         |
| Biomass <sub>DM</sub> <sup>2</sup> | MJ/kg <sup>1</sup> | 17.21   | 17.82    | 17.21     | 19.22    | 17.65   |
| Biomass (wet matter) <sup>2</sup>  | MJ/kg <sup>1</sup> | 12.05   | 11.74    | 12.05     | 9.61     | 13.24   |
| Char                               | MJ/kg <sup>1</sup> | -       | -        | 28.81     | 25.00    | -       |
| <i>Performance</i>                 |                    |         |          |           |          |         |
| Diesel                             |                    | 2.43    | 3.00     | 5.75      | 6.06     | 5.00    |
| Gasoline                           |                    | 6.43    | 3.12     | 4.60      | 6.98     | 2.11    |
| Sum blendstock                     |                    | 8.86    | 6.12     | 10.35     | 13.04    | 7.12    |
| Ratio diesel/gasoline              | %                  | 27.45   | 49.00    | 55.55     | 46.45    | 70.30   |
| Electricity use                    | MJ/kg <sup>1</sup> | -       | -        | 0.44      | 1.52     | -       |
| Electricity credit                 | MJ/kg <sup>1</sup> | 0.22    | 0.67     | -         | -        | 0.60    |
| Natural gas use                    | MJ/kg <sup>1</sup> | 0.01    | -        | 2.08      | 3.28     | 0.09    |
| Char credit                        | MJ/kg <sup>1</sup> | -       | -        | -         | 1.57     | -       |
| Steam use                          | MJ/kg <sup>1</sup> | -       | -        | -         | -        | 0.00d   |
| Steam credit                       |                    | -       | -        | -         | 0.75     | -       |
| Diesel use <sup>3</sup>            |                    | 0.01    | -        | -         | -        | -       |

<sup>1</sup>Per kg dry feedstock, <sup>2</sup>The calorific value for plant concept II was assumed to be the average value of the other four plants concepts, <sup>3</sup>Diesel no.2, <sup>4</sup>Rounded value.

## S.2.2. Methodological assessment

## Economic assessment – Equipment costs summary

**Table S7.** Equipment costs summary and specifications for the current status, calculations based on [8–16].

| Equipment                                  | Description                                                                                                                                                                                                                                                                                                                                                                                                                                                                  | Total Equipment Costs for the Current Status in € | Installed Costs for the Current Status in € |
|--------------------------------------------|------------------------------------------------------------------------------------------------------------------------------------------------------------------------------------------------------------------------------------------------------------------------------------------------------------------------------------------------------------------------------------------------------------------------------------------------------------------------------|---------------------------------------------------|---------------------------------------------|
| <b>Plant I</b>                             |                                                                                                                                                                                                                                                                                                                                                                                                                                                                              |                                                   |                                             |
| <b>Pretreatment</b>                        | Flue gas blower, cross flow pellet dryer, hopper feeder, screener feeder conveyor, radial stacker conveyor, dryer feed screw conveyor, biomass feed screw conveyor, hydraulic truck dump with scale, hammermill, front end loaders, magnetic head                                                                                                                                                                                                                            | 55 017                                            | 107 950                                     |
|                                            | pulley, vibratory conveyor, dump hopper, hammermill surge bin, dryer feed bin, dried biomass hopper, lock hopper, feed hopper                                                                                                                                                                                                                                                                                                                                                |                                                   |                                             |
| <b>Thermo-chemical conversion</b>          |                                                                                                                                                                                                                                                                                                                                                                                                                                                                              | <b>8 777 165</b>                                  | <b>26 576 024</b>                           |
| <i>Fast pyrolysis</i>                      | Fluidizing gas recycle compressor, combustor air compressor, catalytic fluidized bed reactor, char combustor, catalyst cooler, catalyst steam stripper, primary cyclone, secondary cyclone, char combustor primary cyclone, char combustor secondary cyclone, depleted catalyst and ash storage bin, catalyst feed bin                                                                                                                                                       | 8 777 165                                         | 26 576 024                                  |
|                                            | <b>Downstream processing</b>                                                                                                                                                                                                                                                                                                                                                                                                                                                 | <b>8 335 144</b>                                  | <b>14 440 345</b>                           |
| <i>Product condensation and separation</i> | Heavy fraction condenser adsorber, light fraction condenser adsorber, vapor heat exchanger, feed cooler, feed/overhead exchanger, liquid feed chiller, heavy fraction heat exchanger, quench circulating chiller, bottoms pump, circulating filter charge pump, aqueous filter charge pump, organic product pump, quench recycle pump, bottoms filter, bottoms decanter, quench circulation filter, aqueous phase filter, organic product surge tank, circulating surge tank | 1 095 505                                         | 1 748 466                                   |
|                                            | <i>Hydrogen recycle and water gas shift</i>                                                                                                                                                                                                                                                                                                                                                                                                                                  |                                                   |                                             |
| <i>Whole oil hydroprocessing</i>           | Post-WGS heat exchanger, post-WGS cooler, PSA compressor: multistage, PSA, compressor condensate pump, High temperature WGS, PSA compressor suction knock-out, PSA compressor disch knock-out, compressor condensate tank                                                                                                                                                                                                                                                    | 3 763 210                                         | 6 523 523                                   |
|                                            | Feed-effluent exchanger, feed furnace, high temperature product heat exchanger, high temperature product cooler, 1st quench hydrogen cooler, 2nd quench hydrogen cooler, hydrogen makeup compressor, hydrogen recycle compressor, HT feedpump, hydrotreater, vapor knock-out drum, high pressure, high temperature effluent flash, low pressure, high temperature effluent flash                                                                                             | 1 943 555                                         | 3 205 120                                   |
| <i>Oil Fractionation</i>                   | Gasoline column, diesel column, condenser, reboiler, gasoline product cooler, diesel product heat exchanger, diesel product cooler, overhead vapor cooler, 1 <sup>st</sup> reflux pump, 2 <sup>nd</sup> reflux pump, 1 <sup>st</sup> overhead accumulator, 2 <sup>nd</sup> overhead accumulator                                                                                                                                                                              | 240 952                                           | 561 294                                     |
| <i>Hydrocracking</i>                       | Feed-effluent exchanger, feed furnace, hydrocracking product heat exchanger, HC product cooler, 1 <sup>st</sup> quench hydrogen cooler,                                                                                                                                                                                                                                                                                                                                      | 1 291 922                                         | 2 401 942                                   |

|                                            |                                                                                                                                                                                                                                                                                                                                                                                                                                                                                                                                                                                                             |                   |                    |
|--------------------------------------------|-------------------------------------------------------------------------------------------------------------------------------------------------------------------------------------------------------------------------------------------------------------------------------------------------------------------------------------------------------------------------------------------------------------------------------------------------------------------------------------------------------------------------------------------------------------------------------------------------------------|-------------------|--------------------|
|                                            | 2 <sup>nd</sup> quench hydrogen cooler, hydrogen makeup compressor, hydrogen recycle compressor, hydrocracking feed pump, hydrocracker, vapor knock-out drum, high pressure effluent flash, low pressure effluent flash                                                                                                                                                                                                                                                                                                                                                                                     |                   |                    |
| <b>Miscellaneous</b>                       |                                                                                                                                                                                                                                                                                                                                                                                                                                                                                                                                                                                                             | <b>26 934 953</b> | <b>50 864 982</b>  |
| <i>Hydrogen plant</i>                      | Water-gas-shift effluent, water-gas-shift cooler, pyrolysis offgas compressor to reformer, compressor condensate pump, steam reformer package, low temperature separation reactor, compressor condensate tank, reformer combustor air flow, PSA compressor multistage, PSA, water-gas-shift reactor, compressor suction knockout drum, PSA compressor discharge knockout drum                                                                                                                                                                                                                               | 20 431 987        | 38 647 502         |
| <i>Steam system &amp; Power generation</i> | Steam turbine condenser, blowdown cooler, boiler feed water electrode ionization, polishing, 1 <sup>st</sup> stage steam turbine generator, 2 <sup>nd</sup> stage steam turbine generator, startup boiler, makeup pump, condensate pump, electrode ionization pump, boiler feed water pump, condensate collection tank, blowdown flash drum, condensate collection tank, condensate surge tank, deaerator, deaerator packed column, steam drum, steam turbine condensate tank                                                                                                                               | 5 139 549         | 9 433 020          |
| <i>Cooling water &amp; other utilities</i> | Plant air compressor, cooling tower system, hydraulic truck dump with scales, flue gas scrubber, flue gas stack, chilled water system, product loading rack, cooling water pump, firewater pump, diesel pump, ammonia pump, caustic pump, boiler feed water chemical pump, flue gas scrubber circulation pump, gasoline product pump, diesel product pump, instrument air dryer, plant air receiver, firewater storage tank, purchased diesel storage tank, ammonia storage tank, caustic storage tank, boiler feed water chemical storage tank, gasoline product storage tank, diesel product storage tank | 1 363 417         | 2 784 461          |
| <b>Total</b>                               |                                                                                                                                                                                                                                                                                                                                                                                                                                                                                                                                                                                                             | <b>44 102 279</b> | <b>91 989 301</b>  |
| <b>Plant II</b>                            |                                                                                                                                                                                                                                                                                                                                                                                                                                                                                                                                                                                                             |                   |                    |
| <b>Pretreatment</b>                        | Conveyor belt, truck scales, bale unwrapping conveyor, magnetic separator, chopper, dryer, silo with screw conveyor                                                                                                                                                                                                                                                                                                                                                                                                                                                                                         | <b>2 038 687</b>  | <b>6 992 695</b>   |
|                                            | <b>Thermo-chemical conversion</b>                                                                                                                                                                                                                                                                                                                                                                                                                                                                                                                                                                           | <b>8 045 067</b>  | <b>27 594 580</b>  |
| <i>Fast pyrolysis</i>                      | Twin screw mixing reactor, vibration sieve, pneumatic lift, collecting bin, screw conveyor, pyrolysis gas burner, combustion air fan, air preheater, isolation, cyclone, filter, quench, gas cooler, pump, condensate cooler, cooling water pump, pyrolysis gas filter, pyrolysis gas blower, tank for solids, tank for liquids, colloid mixer, screw conveyor, colloid mill, pump, tank for slurry                                                                                                                                                                                                         | 8 045 067         | 27 594 580         |
|                                            | <b>Downstream processing</b>                                                                                                                                                                                                                                                                                                                                                                                                                                                                                                                                                                                | <b>38 499 884</b> | <b>132 054 603</b> |
| <i>Slurry pretreatment</i>                 | Slurry unloading, slurry tank, slurry conveyor, 1 <sup>st</sup> slurry homogenization tank, 2 <sup>nd</sup> slurry homogenization tank, slurry feeding                                                                                                                                                                                                                                                                                                                                                                                                                                                      | 731 010           | 2 507 363          |
| <i>Gasification agent provision</i>        | Air compressor, rectification column, oxygen compressor, nitrogen compressor                                                                                                                                                                                                                                                                                                                                                                                                                                                                                                                                | 3 854 074         | 13 219 476         |
| <i>Condensate and quench water system</i>  | Condensate pump, condensate heat exchanger, waste water treatment, waste water demineralization, tank for treated water, high pressure pump for quench                                                                                                                                                                                                                                                                                                                                                                                                                                                      | 340 336           | 1 167 353          |

|                                                 |                                                                                                                                                                                                                                                                                                                                                                                                                                                                                                                                                                                                                                                                                             |                   |                    |
|-------------------------------------------------|---------------------------------------------------------------------------------------------------------------------------------------------------------------------------------------------------------------------------------------------------------------------------------------------------------------------------------------------------------------------------------------------------------------------------------------------------------------------------------------------------------------------------------------------------------------------------------------------------------------------------------------------------------------------------------------------|-------------------|--------------------|
| <i>Gasification and auxiliaries</i>             | Furnace pump, furnace heat exchanger, inert gas provision, entrained flow gasifier                                                                                                                                                                                                                                                                                                                                                                                                                                                                                                                                                                                                          | 3 658 561         | 12 548 863         |
| <i>Product gas conditioning</i>                 | Gas cleaner, water-gas-shift reactor, gas scrubber, condensate pump, filter, heat exchanger, gas cooler                                                                                                                                                                                                                                                                                                                                                                                                                                                                                                                                                                                     | 1 829 440         | 6 274 978          |
| <i>Synthesis gas cleaning</i>                   | Sour gas cleaner, heat exchanger                                                                                                                                                                                                                                                                                                                                                                                                                                                                                                                                                                                                                                                            | 2 258 239         | 7 745 759          |
| <i>Slag treatment</i>                           | Slag drainage, slag filter, slag conveyor, slag storage, slag loading                                                                                                                                                                                                                                                                                                                                                                                                                                                                                                                                                                                                                       | 786 308           | 2 697 036          |
| <i>Fischer-Tropsch synthesis</i>                | Heat exchanger, turbine, Fischer-Tropsch synthesis reactor, heat exchanger                                                                                                                                                                                                                                                                                                                                                                                                                                                                                                                                                                                                                  | 2 768 603         | 9 496 308          |
| <i>Product recovery</i>                         | Degassing column, decanter, hydrocarbon fractionation, pressure swing adsorption, H <sub>2</sub> compressor, raw product hydrotreater, raw product reformer, distillate hydrotreater, wax hydrocracking, fuel gas compressor                                                                                                                                                                                                                                                                                                                                                                                                                                                                | 22 273 314        | 76 397 467         |
| <b>Total</b>                                    |                                                                                                                                                                                                                                                                                                                                                                                                                                                                                                                                                                                                                                                                                             | <b>48 583 638</b> | <b>166 641 878</b> |
| <b>Plant III</b>                                |                                                                                                                                                                                                                                                                                                                                                                                                                                                                                                                                                                                                                                                                                             |                   |                    |
| <b>Pretreatment<sup>1</sup></b>                 |                                                                                                                                                                                                                                                                                                                                                                                                                                                                                                                                                                                                                                                                                             | <b>2 886 575</b>  | <b>10 239 515</b>  |
| <b>Thermo-chemical conversion</b>               |                                                                                                                                                                                                                                                                                                                                                                                                                                                                                                                                                                                                                                                                                             | <b>39 478 612</b> | <b>40 237 219</b>  |
| <i>Fast pyrolysis</i>                           | CFB pyrolyzer, quench & auxiliaries, pyrolysis oil filters, filtrate screw feeder, steam generator- char burner exhaust, boiler feed water heater (char burner exhaust), air compressor for char exhaust (cooling)                                                                                                                                                                                                                                                                                                                                                                                                                                                                          | 39 478 612        | 40 237 219         |
| <b>Downstream processing</b>                    |                                                                                                                                                                                                                                                                                                                                                                                                                                                                                                                                                                                                                                                                                             | <b>17 450 090</b> | <b>33 564 197</b>  |
| <i>Fast pyrolysis oil upgrading</i>             | Feed pump, stabilizer, 1 <sup>st</sup> stage reactors, 2 <sup>nd</sup> stage reactors, sulfur agent pump, stabilizer product flash, 2 <sup>nd</sup> stage three phase separator, hydrotreating oil flash, expander, stabilized oil cooler, 1 <sup>st</sup> feed/product heat exchanger, 2 <sup>nd</sup> feed/product heat exchanger, hydrotreating oil product heat recovery, hydrotreating oil product cooler, PSA feed heater, blowdown dryer, fired heater, air cooler, light columnfeed heater, reboiler, condenser, light column, reflux drum, stabilized product pump, PSA, PSA off gas compressor, stabilier gas product compressor, makeup hydrogen compressor, hydrogen compressor | 12 644 080        | 28 426 699         |
| <i>Product separation and hydrocracking</i>     | Naphtha splitter, product splitter, reboiler, fired reboiler, 1 <sup>st</sup> air cool condenser, 2 <sup>nd</sup> air cool condenser, 1 <sup>st</sup> reflex drum, 2 <sup>nd</sup> reflex drum, 1 <sup>st</sup> bottom product pump, 2 <sup>nd</sup> bottom product pump, hydrocracker unit (fired heater, hydrocracker vessel, feed/product exchanger, air cooler, trim collar, high pressure flash, low pressure flash, fuel gas compressor), gasoline product cooler, diesel product cooler                                                                                                                                                                                              | 4 806 010         | 5 137 498          |
| <b>Miscellaneous</b>                            |                                                                                                                                                                                                                                                                                                                                                                                                                                                                                                                                                                                                                                                                                             | <b>19 089 746</b> | <b>20 261 192</b>  |
| <i>Hydrogen plant</i>                           | <i>Steam reformer system</i>                                                                                                                                                                                                                                                                                                                                                                                                                                                                                                                                                                                                                                                                | 17 547 564        | 17 547 564         |
| <i>Utilities and wastewater treatment plant</i> | Wastewater aerobic digestion, constructed treatment wetlands water pumps, plant air compressor, hydraulic truck dump with scale, firewater pump, diesel pump, instrument air dryer, plant air receiver, firewater storage tank, sulfur agent storage tank, feed storage, product storage, steam reformer costs: ammonia pump, hydrazine pump, ammonia storage tank, hydrazine storage tank, flare                                                                                                                                                                                                                                                                                           | 1 542 182         | 2 713 627          |
| <b>Total</b>                                    |                                                                                                                                                                                                                                                                                                                                                                                                                                                                                                                                                                                                                                                                                             | <b>78 905 023</b> | <b>104 302 123</b> |

| <b>Plant IV</b>                        |                                                                                                                                                                                                                                                                                                                                                                                                                                                                                                                                                                                                                                                                                                                              |                   |                   |
|----------------------------------------|------------------------------------------------------------------------------------------------------------------------------------------------------------------------------------------------------------------------------------------------------------------------------------------------------------------------------------------------------------------------------------------------------------------------------------------------------------------------------------------------------------------------------------------------------------------------------------------------------------------------------------------------------------------------------------------------------------------------------|-------------------|-------------------|
| <b>Pretreatment</b>                    | Pyrolysis dryer and mill                                                                                                                                                                                                                                                                                                                                                                                                                                                                                                                                                                                                                                                                                                     | <b>6 553 035</b>  | <b>25 100 747</b> |
|                                        | <b>Thermo-chemical conversion</b>                                                                                                                                                                                                                                                                                                                                                                                                                                                                                                                                                                                                                                                                                            | <b>5 846 584</b>  | <b>22 394 755</b> |
| <i>Fast pyrolysis</i>                  | Catalyst (sand) in pyrolysis reactor, 1 <sup>st</sup> heat exchanger, 2 <sup>nd</sup> heat exchanger, pumps, quench , Flash,1 <sup>st</sup> pyrolysis compressor ,2 <sup>nd</sup> pyrolysis compressor, 3 <sup>rd</sup> pyrolysiscompressor , Pyrolysis reactor, gas and char combustor                                                                                                                                                                                                                                                                                                                                                                                                                                      | 5 846 584         | 22 394 755        |
|                                        | <b>Downstream processing</b>                                                                                                                                                                                                                                                                                                                                                                                                                                                                                                                                                                                                                                                                                                 | <b>11 617 617</b> | <b>44 923 931</b> |
| <i>Biorefinery unit</i>                | Catalysts, 1 <sup>st</sup> - 4 <sup>th</sup> heat exchanger hydrotreating, 1 <sup>st</sup> - 3 <sup>rd</sup> heat exchanger hydrocracking,1 <sup>st</sup> - 3 <sup>rd</sup> heat exchanger steam reforming , hydrotreating pump, 1 <sup>st</sup> - 2 <sup>nd</sup> hydrocracking pump, Steam reforming pump, hydrotreating flash, hydrocrackingflash, Steam reforming condenser, hydrotreating compressor, hydrocracking compressor,1 <sup>st</sup> - 2 <sup>nd</sup> steam refoming compressor, 1 <sup>st</sup> - 2 <sup>nd</sup> hydrocracking distillation,1 <sup>st</sup> - 2 <sup>nd</sup> hydrotreating reactor, hydrocracking reactor , steam reforming reactor ,steam reforming water gas shift, steam reforming PSA | 11 617 617        | 44 923 931        |
| <b>Total</b>                           |                                                                                                                                                                                                                                                                                                                                                                                                                                                                                                                                                                                                                                                                                                                              | <b>24 017 237</b> | <b>92 419 433</b> |
| <b>Plant V</b>                         |                                                                                                                                                                                                                                                                                                                                                                                                                                                                                                                                                                                                                                                                                                                              |                   |                   |
| <b>Pretreatment</b>                    | Bale transport conveyor, bale unwrapping conveyor, truck scales, magnetic separator, chopper, chopper conveyor, chopper screen with recycle conveyor, dryer, grinder, grinder conveyor, grinder screen with recycle conveyor                                                                                                                                                                                                                                                                                                                                                                                                                                                                                                 | <b>2 899 559</b>  | <b>8 756 668</b>  |
|                                        | <b>Thermo-chemical conversion</b>                                                                                                                                                                                                                                                                                                                                                                                                                                                                                                                                                                                                                                                                                            | <b>13 153 758</b> | <b>31 166 721</b> |
| <i>Gasification</i>                    | Combustor-Steam boiler, entrained flow, slagging gasifier, slag collector, direct quench syngas cooler, biomass receiving hopper, lock hopper, biomass feeding bin                                                                                                                                                                                                                                                                                                                                                                                                                                                                                                                                                           | 8 733 322         | 20 523 306        |
| <i>Syngas cleaning</i>                 | High pressure amine system, sour water gas shift stream compressor, sour water gas shift reactor, liquid oxidation catalyst absorber, liquid oxidation catalyst oxidizer vessel, carbon dioxide compressor, liquid collection tank, direct quench syngas cooler, venturi scrubber                                                                                                                                                                                                                                                                                                                                                                                                                                            | 4 420 436         | 10 643 415        |
|                                        | <b>Downstream processing</b>                                                                                                                                                                                                                                                                                                                                                                                                                                                                                                                                                                                                                                                                                                 | <b>5 524 269</b>  | <b>16 804 943</b> |
| <i>Fuel synthesis</i>                  | Booster syngas compressor, recycle syngas booster compressor, PSA booster compressor, syngas heater, syngas cooler, recycle syngas preheater, Fischer-Tropsch reactor, ZnO sulfur removal beds, pressure swing adsorption unit, FT knock-out column, water separator                                                                                                                                                                                                                                                                                                                                                                                                                                                         | 5 524 269         | 16 804 943        |
| <b>Miscellaneous</b>                   |                                                                                                                                                                                                                                                                                                                                                                                                                                                                                                                                                                                                                                                                                                                              | <b>17 752 258</b> | <b>53 611 818</b> |
| <i>Hydroprocessing</i>                 | Hydroprocessing unit, gasoline 30-day storage tank, diesel 30-day storage tank                                                                                                                                                                                                                                                                                                                                                                                                                                                                                                                                                                                                                                               | 3 166 737         | 9 563 546         |
| <i>Power generation</i>                | Combustion turbine- electric generator, cooling water pump, heat recovery steam generator, high pressure steam pump, high pressure steam/water separation, combined steam turbine- electric generator, air compressor                                                                                                                                                                                                                                                                                                                                                                                                                                                                                                        | 10 558 795        | 31 887 560        |
| <i>Air separation Unit<sup>2</sup></i> | Air compressor, air cooler, oxygen compressor cooler, oxygen compressor, high pressure column condenser, high pressure column condenser accumulator, high pressure column reflux pump, high pressure column tower,1 <sup>st</sup> air compressor inter-cooler, 2 <sup>nd</sup> air compressor intercooler, 3 <sup>rd</sup> air compressor inter-cooler, low pressure column reboiler, low pressure column                                                                                                                                                                                                                                                                                                                    | 4 026 726         | 12 160 711        |

tower, water knock-out drum, gas expander, water knock-out drum

|              |                   |                    |
|--------------|-------------------|--------------------|
| <b>Total</b> | <b>39 329 844</b> | <b>110 340 150</b> |
|--------------|-------------------|--------------------|

<sup>1</sup>Pretreatment costs: 0.93% of feedstock costs [8].

#### Economic assessment – Demand-related costs summary

**Table S8.** Energy prices for industrial consumers and sellers [17].

| Costs component                                         | Unit  | Northern Europe | Central Europe | Southern Europe |
|---------------------------------------------------------|-------|-----------------|----------------|-----------------|
| <i>Purchasing</i>                                       |       |                 |                |                 |
| Natural gas                                             | €/GJ  | 7.93            | 8.30           | 7.66            |
| Electricity                                             | €/kWh | 0.06            | 0.15           | 0.11            |
| <i>Selling</i>                                          |       |                 |                |                 |
| Diesel                                                  | €/l   | 0.50            | 0.42           | 0.46            |
| Gasoline                                                | €/l   | 0.45            | 0.44           | 0.48            |
| Electricity basic price without taxes and levies        | €/kWh | 0.0585          | 0.0813         | 0.1078          |
| Electricity basic price taxes and levies other than VAT | €/kWh | 0.0005          | 0.0680         | 0.0055          |
| Electricity selling price <sup>1</sup>                  | €/kWh | 0.0146          | 0.0369         | 0.0280          |

<sup>1</sup>The electricity price for selling is assumed to be 24,7 % of the total electricity price for industrial consumers in 2015 [18].

#### Economic assessment – Catalyst prices

**Table S9.** Catalyst prices [8-12,19] and expert knowledge.

| Plant concept | Unit              | Northern Europe | Central Europe | Southern Europe |
|---------------|-------------------|-----------------|----------------|-----------------|
| Plant I       | €/t <sub>DM</sub> | 32.56           | 29.77          | 26.67           |
| Plant II      | €/t <sub>DM</sub> | 20.37           | 18.62          | 16.68           |
| Plant III     | €/t <sub>DM</sub> | 22.68           | 20.74          | 18.58           |
| Plant IV      | €/t <sub>DM</sub> | 3.42            | 3.12           | 2.80            |
| Plant V       | €/t <sub>DM</sub> | 4.91            | 4.49           | 4.02            |

#### Environmental assessment – Allocation methodology

The results of the life cycle assessment can be significantly affected by the choice of allocation methodology since based on the allocation methodology applied a broad variety of results can be gained. The allocation methodology for agricultural residues and main products and co-products generated of the conversion processes are defined in the following.

*Agricultural residues.* The allocation methodology for the agricultural residues is the cereal unit allocation approach, to distinguish between the wheat grain and wheat straw produced. The results for the different allocation methods are listed in Table S10.

**Table S10.** Selected allocation methods for grain and straw [20].

| Type of allocation     | Unit | Grain | Straw |
|------------------------|------|-------|-------|
| Mass allocation        | %    | 56    | 44    |
| Energy allocation      | %    | 55    | 45    |
| Economic allocation    | %    | 77    | 23    |
| Cereal unit allocation | %    | 72    | 25    |

In general, the results of life cycle assessments can be highly influenced by the choice of allocation approach. Biomass provision systems are especially influenceable by allocation due to their co-products. Hence, if the allocation methodology is not aligned properly for the different products from the same biomass provision system, methodological inconsistencies may appear. This may cause that for instance parts of the environmental burden of a product or co-product might be either unaccounted or wrongly accounted for. The cereal unit allocation approach is based on the principle of quantifying the products and co-products dependent on the nutritional value for livestock [20].

*Products and co-products.* The allocation factors of the products and co-products of the conversion processes are displayed in Figure S3. The allocation is based on the energy content (i.e. MJ).

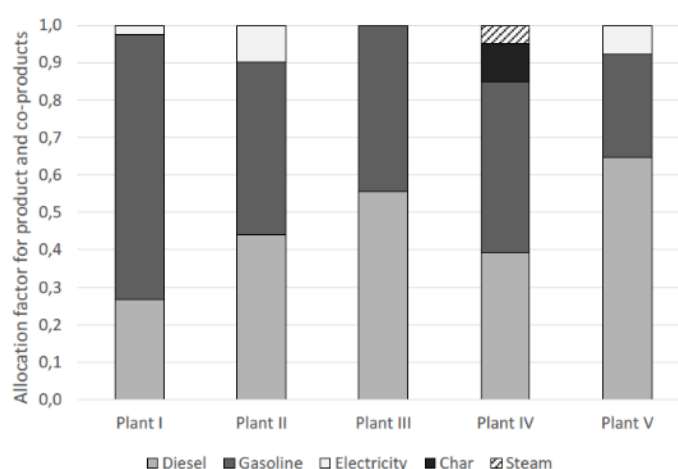

**Figure S3.** Allocation factors for the selected plant concepts per product (i.e. diesel) and co-product (i.e. gasoline, electricity, char and steam).

### S.2.3. Results

#### Evaluation of relevant biomass resources

**Table S11.** Technical potential of forestry residues, agricultural residues and energy crops in selected NUTS-3 regions for the current status, calculated based on [21].

| Parameter                          | Unit                             | Northern Europe | Central Europe              | Southern Europe |
|------------------------------------|----------------------------------|-----------------|-----------------------------|-----------------|
| Country                            |                                  | Sweden          | Germany                     | Spain           |
| Location                           |                                  | Skane län       | Mecklenburgische Seenplatte | Ciudad Real     |
| NUTS-3-region                      |                                  | SE224           | DE80J                       | ES422           |
| Forestry residues <sup>1</sup>     | t <sub>DM</sub> /km <sup>2</sup> | 67.5            | 46.6                        | 7.8             |
| Agricultural residues <sup>2</sup> | t <sub>DM</sub> /km <sup>2</sup> | 216.0           | 230.3                       | 52.2            |
| Energy crops <sup>3</sup>          | t <sub>DM</sub> /km <sup>2</sup> | 0.4             | 0.4                         | 130.8           |
| Forestry residues                  | €/t <sub>DM</sub>                | 51.4            | 39.8                        | 32.2            |
| Agricultural residues              | €/t <sub>DM</sub>                | 46.3            | 36.7                        | 33.6            |
| Energy crops                       | €/t <sub>DM</sub>                | 106.2           | 62.3                        | 52.7            |

<sup>1</sup>Logging residues and stumps from final fellings and thinnings from coniferous and non-coniferous trees; <sup>2</sup>Cereal straw, oil seed rape straw, maize stover, sugar beet leaves, sunflower straw; <sup>3</sup>Primary production of lignocellulosic biomass crops, i.e., energy grasses, annual and perennial crops, e.g., miscanthus, switchgrass, giant reed, reed canary grass.



## Evaluation of relevant biomass provision and logistics

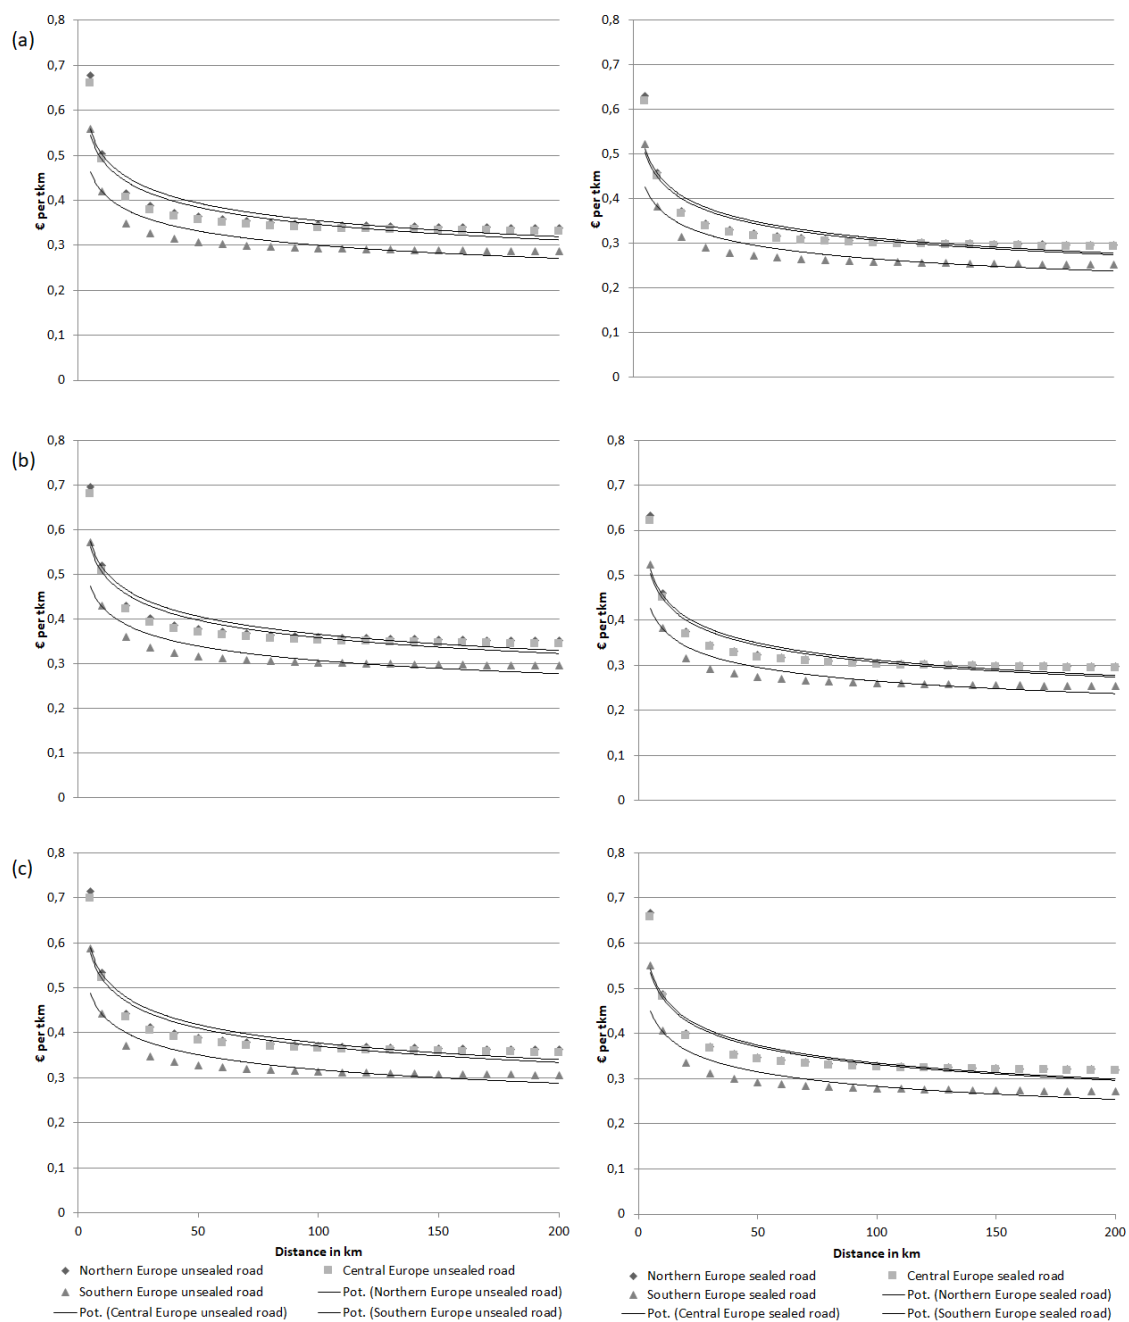

**Figure S4.** Transportation costs for for (a) chip, (b) straw and (c) oil trucks on sealed and unsealed road.

## Economic assessment – Parameter variation

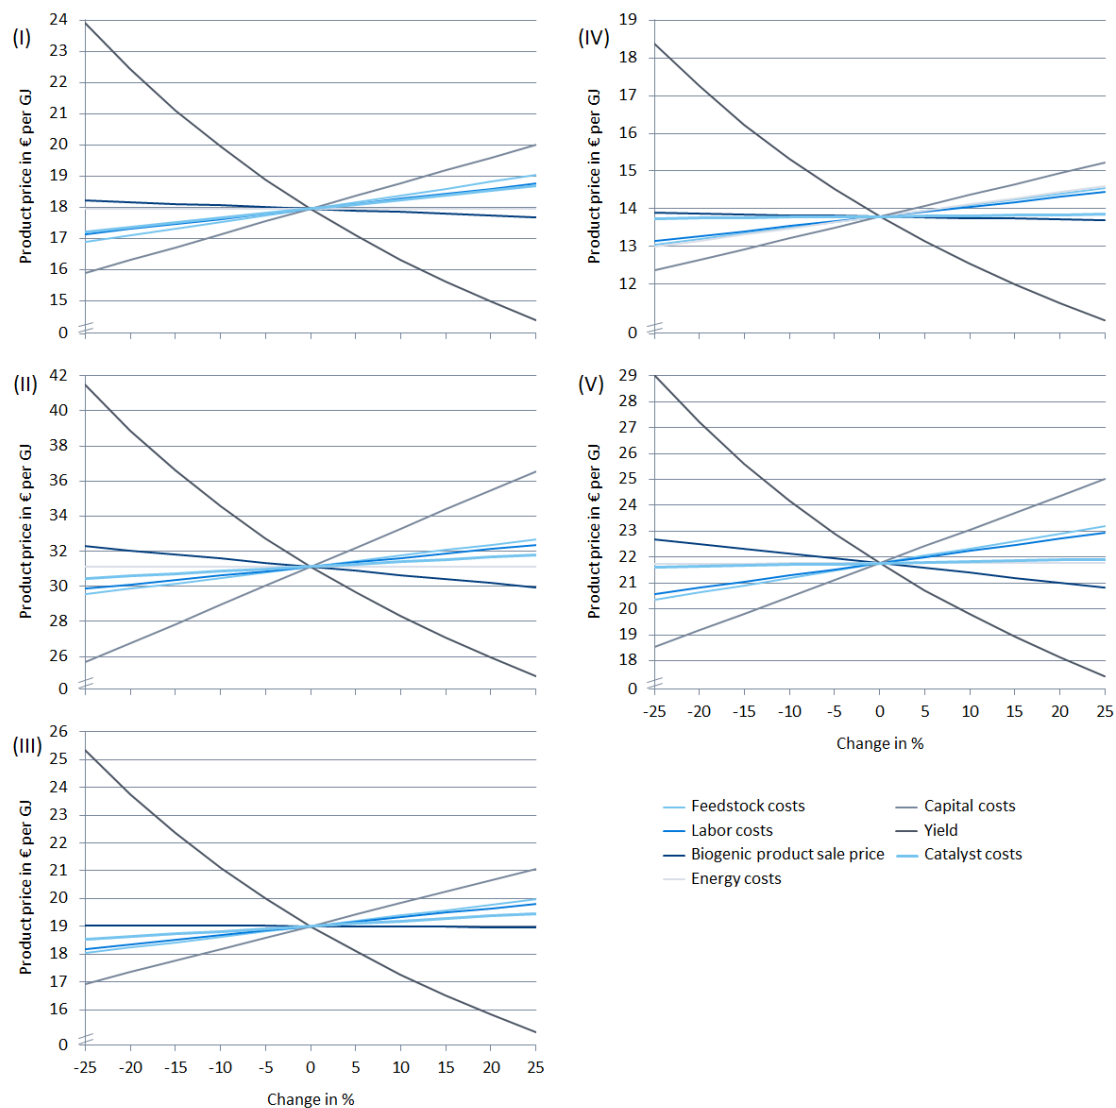

**Figure S5.** Variation of the parameters (i) feedstock costs, (ii) labor costs, (iii) fuel sale price, (iv) energy costs, (v) capital costs, (vi) yield and (vii) catalyst costs for the five plant concepts in Northern Europe.

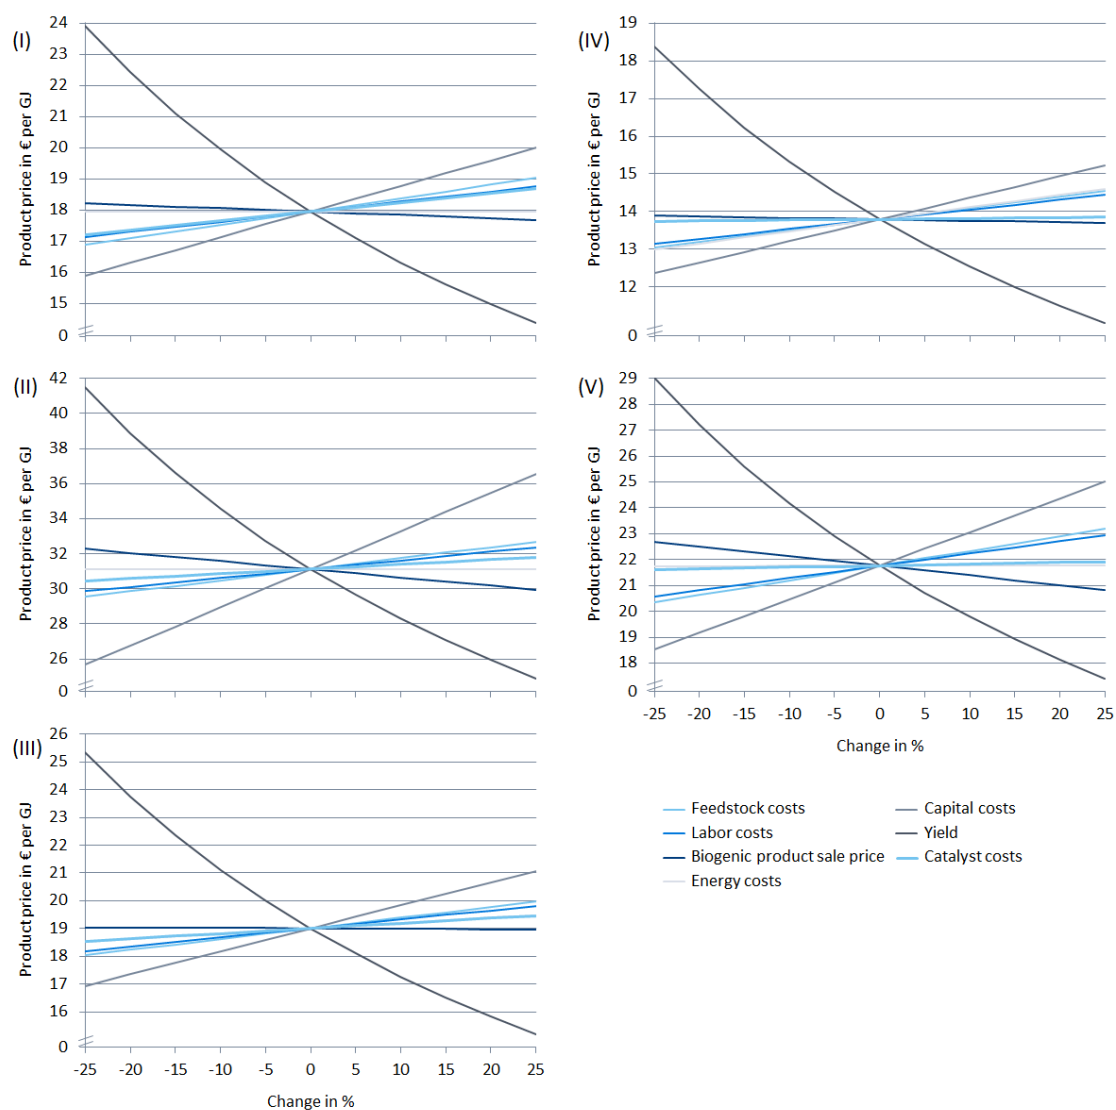

**Figure S6.** Variation of the parameters (i) feedstock costs, (ii) labor costs, (iii) fuel sale price, (iv) energy costs, (v) capital costs, (vi) yield and (vii) catalyst costs for the five plant concepts in Central Europe.

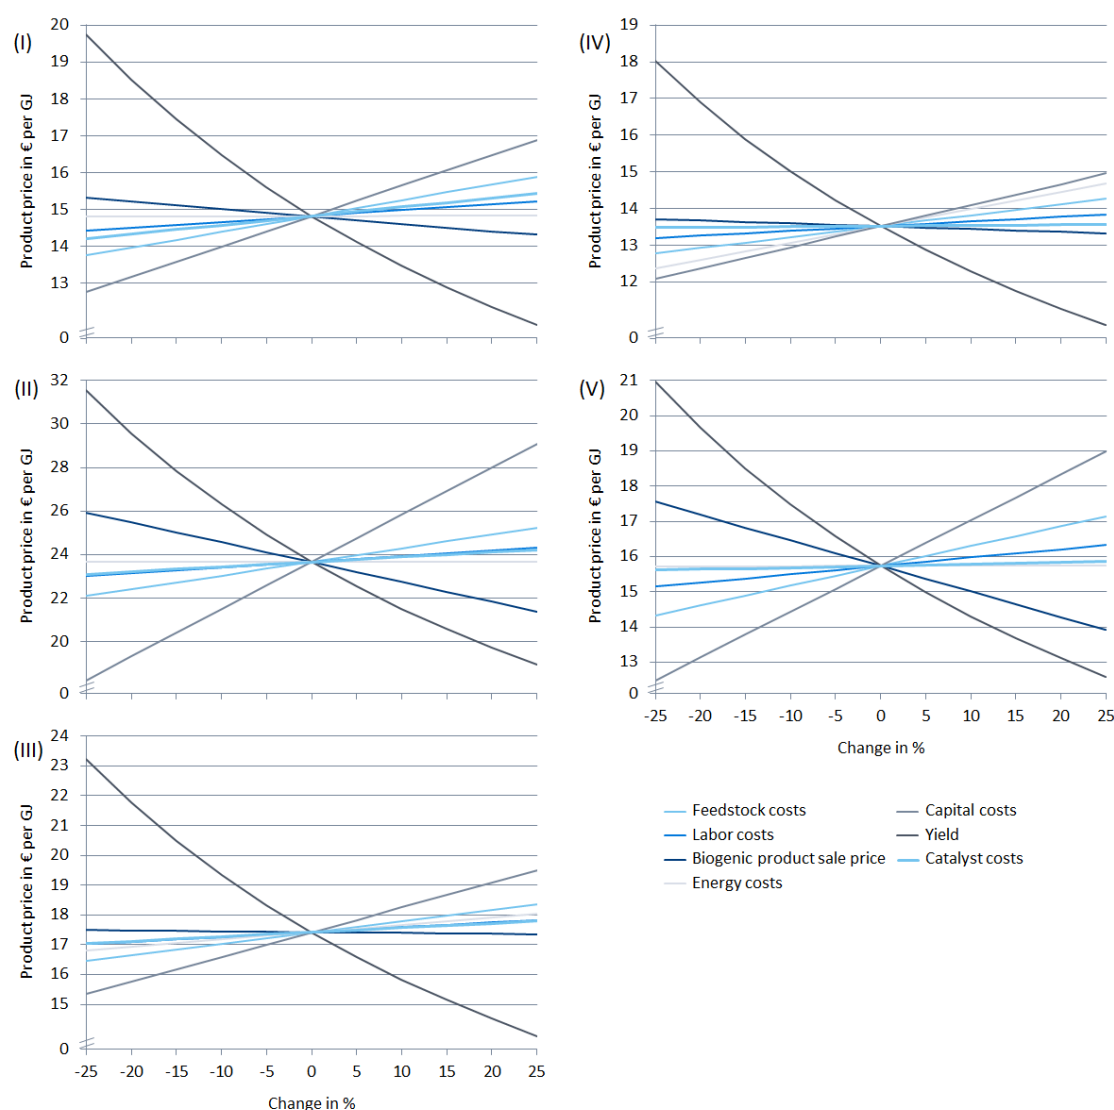

**Figure S7.** Variation of the parameters (i) feedstock costs, (ii) labor costs, (iii) fuel sale price, (iv) energy costs, (v) capital costs, (vi) yield and (vii) catalyst costs for the five plant concepts in Southern Europe.

## References

1. Kappler, G. Systemanalytische Untersuchung Zum Aufkommen Und Zur Bereitstellung von Energetisch Nutzbarem Reststroh Und Waldrestholz in Baden-Württemberg: Eine Auf Das Karlsruher Bioliq®-Konzept Ausgerichtete Standortanalyse :Wissenschaftliche Berichte FZKA 7416; Karlsruhe Institute of Technology, Karlsruhe, Germany 2008.
2. Leible, L.; Kälber, S.; Kappler, G.; Lange, S.; Nieke, E.; Proplesch, P.; Wintzer, D.; Fürniß, B. *Kraftstoff, Strom Und Wärme Aus Stroh Und Waldrestholz: Eine Systemanalytische Untersuchung*; Karlsruhe Institute of Technology: Karlsruhe, Germany 2007.
3. Leible, L.; Kälber, S.; Kappler, G.O. *Systemanalyse Zur Gaserzeugung Aus Biomasse: Untersuchung Ausgewählter Aspekte: Biomasseaufkommen Und -Bereitstellung, Biomasseeinspeisung in Einen Druckvergaser, Verfahrensvergleich Der FT- Und Methanolproduktion*; KIT scientific reports; KIT Scientific Publishing: Karlsruhe, Germany, 2011; Volume 7580; ISBN 978-3-86644-656-4.
4. Perlack, R.; Wright, L.; Turhollow, A.; Graham, R.; Stokes, B.; Erbach, D. *Biomass as Feedstock for a Bioenergy and Bioproducts Industry: The Technical Feasibility of a Billion-Ton Annual Supply*; DOE/GO-102005-2135; U.S. Department of Energy and U.S. Department of Agriculture: Washington D.C., United States, 2005.
5. Renouf, M.A.; Wegener, M.K.; Nielsen, L.K. An Environmental Life Cycle Assessment Comparing Australian Sugarcane with US Corn and UK Sugar Beet as Producers of Sugars for Fermentation. *Biomass Bioenergy* **2008**, *32*, 1144–1155, doi:10.1016/j.biombioe.2008.02.012.
6. Suurs, R. *Long Distance Bioenergy Logistics: An Assessment of Costs and Energy Consumption for Various Biomass Energy Transport Chains*; Utrecht University, Department of Science, Technology and Society: Utrecht, Germany, 2002; ISBN 90-73958-83-0.

7. Thüringer Landesanstalt für Landwirtschaft *Optimierung Der Nachhaltigen Biomassebereitstellung von Repräsentativen Dauergrünlandtypen Für Die Thermische Verwertung*; Thüringer Landesanstalt für Landwirtschaft: Jena, Germany, 2011.
8. Dutta, A.; Sahir, A.; Tan, E.; Humbird, D.; Snowden-Swan, L.; Meyer, P.; Ross, J.; Sexton, D.; Yap, R.; Lukas, J. *Process Design and Economics for the Conversion of Lignocellulosic Biomass to Hydrocarbon Fuels: Thermochemical Research Pathways with In Situ and Ex Situ Upgrading of Fast Pyrolysis Vapors*; Colorado, U.S. Department of Energy: Washington D.C., US, 2015.
9. Peters, J. *Pyrolysis for Biofuels or Biochar? A Thermodynamic, Environmental and Economic Assessment*. Ph.D. Thesis, Universidad Rey Juan Carlos: Móstoles, Madrid, 10.12.2014. 2015.
10. Trippe, F. *Techno-Ökonomische Bewertung Alternativer Verfahrenskonfigurationen Zur Herstellung von Biomass-to-Liquid (BtL) Kraftstoffen Und Chemikalien*: KIT, Ph Thesis–Karlsruhe, 2013; Produktion und Energie; Print on demand.; KIT Scientific Publishing and Technische Informationsbibliothek u. Universitätsbibliothek: Karlsruhe and Hannover, 2013; Vol. 3; ISBN 978-3-7315-0031-5.
11. Jones, S.; Meyer, P.; Snowden-Swan, L.; Tan, E.; Dutta, A.; Jacobsen, J.; Cafferty, K. *Process Design and Economics for the Conversion of Lignocellulosic Biomass to Hydrocarbon Fuels: Fast Pyrolysis and Hydrotreating Bio-Oil Pathway*; U.S. Department of Energy Bio-energy Technologies Office: Washington D.C., USA, 2013.
12. Swanson, R.M.; Platon, A.; Satrio, J.A.; Brown, R.C.; Hsu, D.D. *Techno-Economic Analysis of Biofuels Production Based on Gasification*, National Renewable Energy Laboratory: Golden, CO, USA, 2010.
13. Aden, A.; Ruth, M.; Ibsen, K.; Jechura, J.; Neeves, K.; Sheehan, J.; Wallace, B.; Montague, L.; Slayton, A.; Lukas, J. *Lignocellulosic Biomass to Ethanol Process Design and Economics Utilizing Co-Current Dilute Acid Prehydrolysis and Enzymatic Hydrolysis for Corn Stover*; National Renewable Energy Laboratory: Golden, CO, US, 2002.
14. CEPCI *The Chemical Engineering Plant Cost Index*, Chemical Engineering Magazine. U.S. Department of Labor's Bureau of Labor Statistics: Washington D.C., United States, 2017.
15. European Central Bank Euro Reference Exchange Rate: US Dollar (USD) Available online: [https://www.ecb.europa.eu/stats/policy\\_and\\_exchange\\_rates/euro\\_reference\\_exchange\\_rates/html/eurofxref-graph-usd.en.html](https://www.ecb.europa.eu/stats/policy_and_exchange_rates/euro_reference_exchange_rates/html/eurofxref-graph-usd.en.html) (accessed on 9 August 2020).
16. Marker, T.; Petri, J.; Kalnes, T.; McCall, M.; Mackowiak, D.; Jerosky, B.; Reagan, B.; Nemeth, L.; Krawczyk, M. *Opportunities for Biorenewables in Oil Refineries: Final Technical Report*; US Department of Energy: Washington D.C., US, 2005.
17. Eurostat. *Database: Your Key to European Statistics*; Statistical Office of the European Communities; European Commission: Brussels, Belgium, 2019.
18. Bundesnetzagentur für Elektrizität, Gas, Telekommunikation, Post und Eisenbahnen; Bundeskartellamt. *Monitoringbericht 2016*; Bundesnetzagentur für Elektrizität, Gas, Telekommunikation, Post und Eisenbahnen and Bundeskartellamt: Bonn, Germany, 2016.
19. Rotter, S.; Rohrhofer, C. *Biomass Logistics: Deliverable*; BioBoost, Ed.; European Commission: Brussels, Belgium 2013.
20. Brankatschk, G.; Finkbeiner, M. Application of the Cereal Unit in a New Allocation Procedure for Agricultural Life Cycle Assessments. *J. Clean. Prod.* **2014**, *73*, 72–79, doi:10.1016/j.jclepro.2014.02.005.
21. Dees, M.; Elbersen, B.; Fitzgerald, J.; Vis, M.; Anttila, P.; Forsell, N.; Ramirez-Almeyda, J.; García Galindo, D.; Glavonjic, B.; Staritsky, I.; et al. A Spatial Data Base on Sustainable Biomass Cost-Supply of Lignocellulosic Biomass in Europe—Methods & Data Sources: Project Report. S2BIOM—A Project Funded under the European Union 7th Frame Programme. Grant Agreement N°608622 2016. Available online: [https://www.s2biom.eu/images/Publications/D1.6\\_S2Biom\\_Spatial\\_data\\_methods\\_data\\_sources\\_Final\\_Final.pdf](https://www.s2biom.eu/images/Publications/D1.6_S2Biom_Spatial_data_methods_data_sources_Final_Final.pdf) (accessed on 31 August 2021)
